# Supplementary material for: Infrared spectroscopic measurements of the structure of organic thin films; furfural on Pd(111) and Au(111) surfaces
Source: Royal Society of Chemistry journal article supplement (doi:10.1039/d1ce00565k), 2021-01-01

# Infrared Spectroscopic Measurements of the Structure of Organic Thin Films; Furfural on Pd(111) and Au(111) Surfaces

by

Robert Bavisotto, Nick Hopper, Alejandro Boscoboinik, Quintus Owen, and Wilfred T. Tysoe\*

*Department of Chemistry and Biochemistry, University of Wisconsin-Milwaukee, Milwaukee, WI*

*53211, USA*

## Supplemental Information

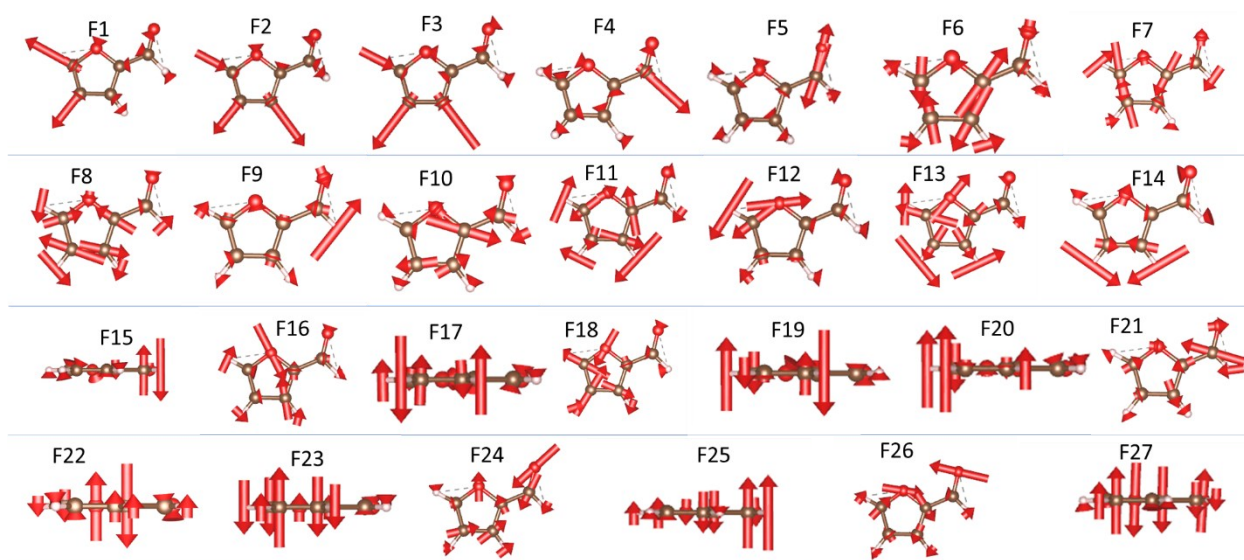

**Figure S1:** Cis-furfural normal modes with arrows depicting mass displacements vectors

**Figure S2:** Trans-furfural normal modes with arrows depicting mass displacements vectors

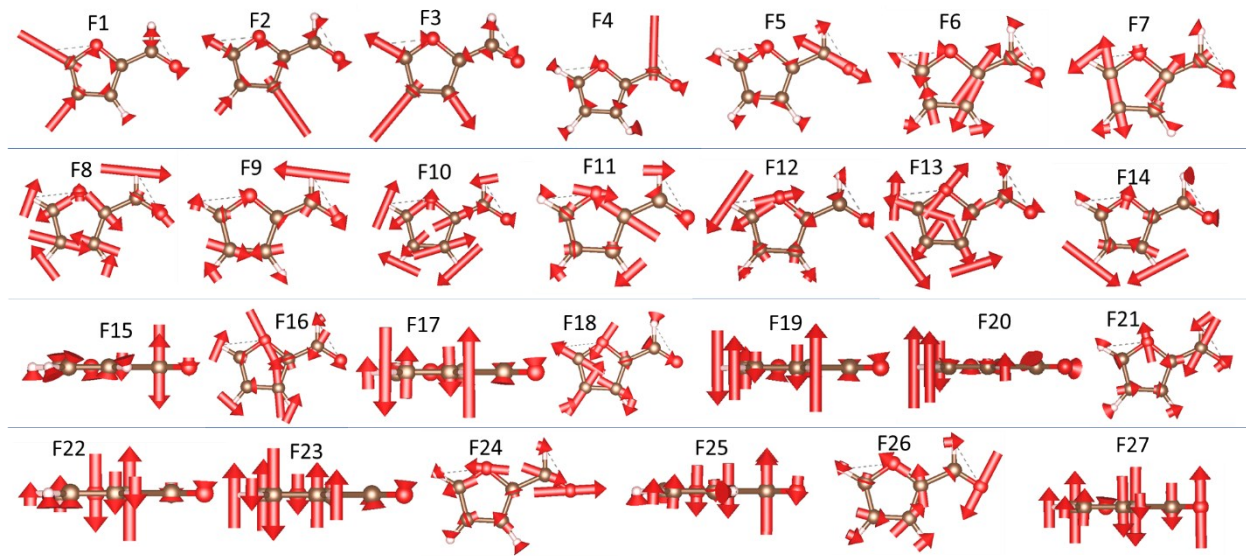

**Figure S3:** Infrared spectra of a clean copper foil measured as a function of sample temperature to show the variation in background signal as the temperature varies. The variation in background signal is much smaller than the absorbances on the multilayer furfural signals.

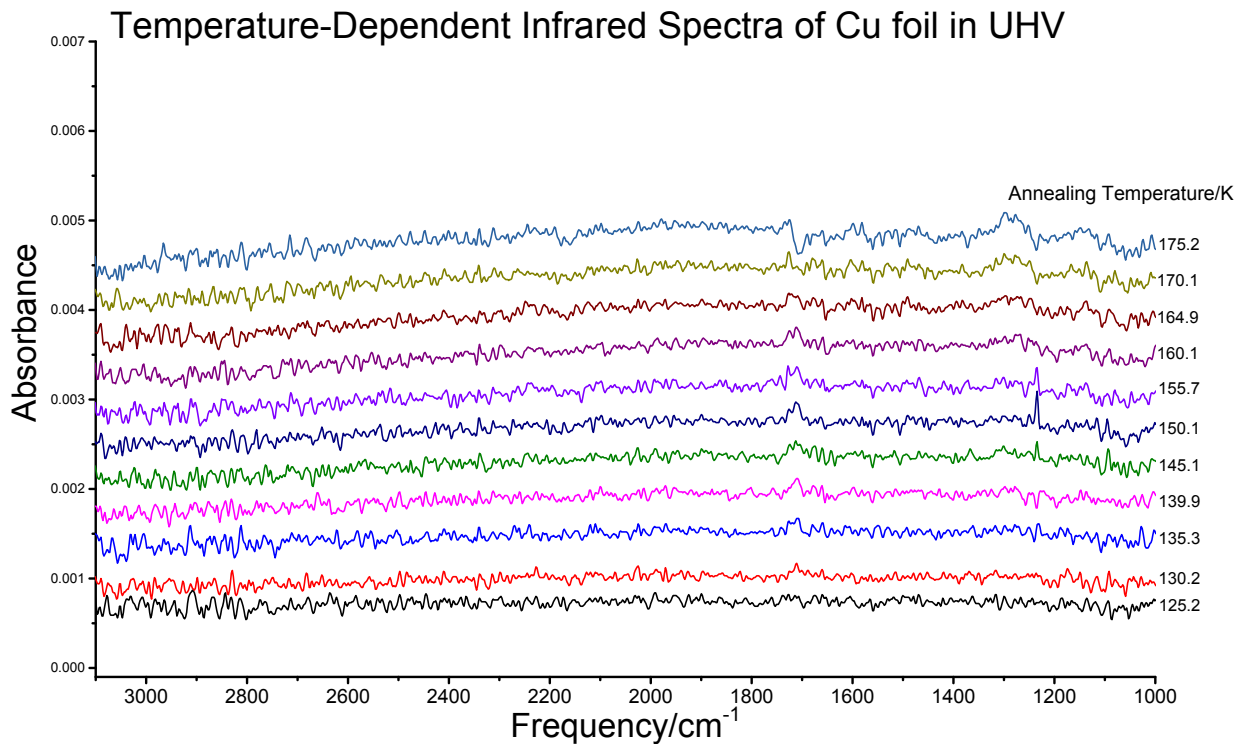

Supplement: d1ce00565k1.pdf [file d1ce00565k1.pdf]
